# Supplementary material
Source: PubMed Central journal article supplement (PMC7509839)
Supplement: ic0c01931_si_001.pdf [file ic0c01931_si_001.pdf]

Supporting Information for

## Probing a silent metal: A Combined X-ray Absorption and Emission Spectroscopic Study of Biologically Relevant Zinc Complexes

Olivia McCubbin Stepanic,<sup>a</sup> Jesse Ward,<sup>b,d</sup> James E. Penner-Hahn,<sup>b</sup> Aniruddha Deb,<sup>b</sup> Uwe Bergmann,<sup>c\*</sup> Serena DeBeer<sup>a\*</sup>

<sup>a</sup>Max Planck Institute for Chemical Energy Conversion, Stiftstr. 34-36, D-45470 Mülheim an der Ruhr, Germany

<sup>b</sup>University of Michigan, Ann Arbor, Michigan 48109, United States

<sup>c</sup>PULSE Institute, SLAC National Accelerator Laboratory, Menlo Park, California 94025, United States

<sup>d</sup>Current address: PNNL, Richland, Washington 99354 United States

email: [bergmann@slac.stanford.edu](mailto:bergmann@slac.stanford.edu); [serena.debeer@cec.mpg.de](mailto:serena.debeer@cec.mpg.de)

### Table of Contents

|                                                                                                            |       |
|------------------------------------------------------------------------------------------------------------|-------|
| 1. Sample Input Files for Calculations                                                                     | p. 2  |
| 2. Optimized Molecular Geometries                                                                          |       |
| a. Zn(BzO) <sub>2</sub> (SC(NH <sub>2</sub> ) <sub>2</sub> ) <sub>2</sub>                                  | p. 2  |
| b. Zn(BzO) <sub>2</sub> (pyNH <sub>2</sub> ) <sub>2</sub>                                                  | p. 3  |
| c. Zn(SPh) <sub>4</sub>                                                                                    | p. 4  |
| d. Zn( <sup>Me</sup> Im) <sub>2</sub> (SPh) <sub>2</sub>                                                   | p. 5  |
| e. Zn( <sup>Me</sup> Im) <sub>4</sub>                                                                      | p. 6  |
| f. Zn( <sup>Me</sup> Im) <sub>6</sub>                                                                      | p. 8  |
| VtC XES data collection from low to high and high to low energy: Figure S1                                 | p. 10 |
| 3. Experimental VtC XES Fits: Figure S2                                                                    | p. 13 |
| 4. Kβ Mainline Overlay: Figure S3                                                                          | p. 16 |
| 5. Zn( <sup>Me</sup> Im) <sub>2</sub> (SPh) <sub>2</sub> Ligand-Ligand Interaction Calculations: Figure S4 | p. 17 |
| a. Molecular model of Zn( <sup>Me</sup> Im) <sub>2</sub> (SPh) <sub>2</sub>                                |       |
| b. Zn-S-C Angle Modulation Impact on VtC Spectra                                                           |       |

Sample calculation input files for bis(benzoato-O)bis(thiourea-S)zinc(II) for XES (left) and XAS data (right).

|                                                                                                                                                                                                                                                                                                                                 |                                                                                                                                                                                                                           |
|---------------------------------------------------------------------------------------------------------------------------------------------------------------------------------------------------------------------------------------------------------------------------------------------------------------------------------|---------------------------------------------------------------------------------------------------------------------------------------------------------------------------------------------------------------------------|
| <pre>!RKS B3LYP TightOpt TightSCF ZORA-def2-TZVP !SARC/J D3BJ RIJCOSX ZORA !FREQ PAL8 Largeprint Printbasis  %xes CoreOrb 0 OrbOp 0 end  *xyz 0 1 O -4.73509633471595 -0.33989320618859 8.45692252911864 C -5.91283128245614 0.06217706725197 8.78501193027164 C -6.98169908438880 -0.99404197769231 8.79615025738138 ...</pre> | <pre>!RKS B3LYP TightSCF ZORA-def2-TZVP !SARC/J D3BJ RIJCOSX ZORA !PAL8 Normalprint MOREAD  %moinp "benzurea_a.gbw"  %tddft orbwin[0]= 0,0,-1,-1 doquad true nroots 300 maxdim 50 end  * xyzfile 0 1 benzurea_a.xyz</pre> |
|---------------------------------------------------------------------------------------------------------------------------------------------------------------------------------------------------------------------------------------------------------------------------------------------------------------------------------|---------------------------------------------------------------------------------------------------------------------------------------------------------------------------------------------------------------------------|

The generated output files were used together with the command `orca_mapspc`, as shown below:  
XES: `orca_mapspc name.mpi8.out xesq -eV -x09000 -x110000 -n10001 -w2.25`  
XAS: `orca_mapspc name.mpi8.out absq -eV -x09000 -x110000 -n10001 -kw0.03`

Optimized geometry coordinates of relevant complexes.

**c. Zn(BzO)<sub>2</sub>(SC(NH<sub>2</sub>)<sub>2</sub>)<sub>2</sub>**

|   |               |              |             |
|---|---------------|--------------|-------------|
| 8 | -4.757184000  | -0.262468000 | 8.331585000 |
| 6 | -5.912918000  | 0.072291000  | 8.760510000 |
| 6 | -6.929359000  | -1.029247000 | 8.804646000 |
| 6 | -6.557240000  | -2.348966000 | 8.549221000 |
| 1 | -5.523137000  | -2.564022000 | 8.318869000 |
| 6 | -7.506440000  | -3.361266000 | 8.588477000 |
| 1 | -7.210853000  | -4.384696000 | 8.393836000 |
| 6 | -8.834099000  | -3.059538000 | 8.871187000 |
| 1 | -9.575283000  | -3.848820000 | 8.895114000 |
| 6 | -9.210246000  | -1.744058000 | 9.123292000 |
| 1 | -10.243809000 | -1.508139000 | 9.344199000 |
| 6 | -8.259218000  | -0.733255000 | 9.098712000 |
| 1 | -8.528952000  | 0.294193000  | 9.301168000 |
| 8 | -6.241032000  | 1.217130000  | 9.123730000 |
| 8 | -1.879671000  | -0.259091000 | 7.566520000 |
| 6 | -0.672330000  | 0.106315000  | 7.359392000 |
| 6 | 0.347985000   | -0.993986000 | 7.334931000 |
| 6 | -0.034643000  | -2.322228000 | 7.524467000 |
| 1 | -1.080736000  | -2.546570000 | 7.679725000 |
| 6 | 0.919132000   | -3.331306000 | 7.517423000 |
| 1 | 0.616130000   | -4.360314000 | 7.666097000 |
| 6 | 2.260824000   | -3.020418000 | 7.325138000 |
| 1 | 3.004440000   | -3.807938000 | 7.323426000 |
| 6 | 2.647568000   | -1.697335000 | 7.136670000 |
| 1 | 3.692377000   | -1.454103000 | 6.987185000 |

|    |              |              |              |
|----|--------------|--------------|--------------|
| 6  | 1.694358000  | -0.688108000 | 7.139096000  |
| 1  | 1.975637000  | 0.345998000  | 6.994866000  |
| 30 | -3.300237000 | 0.987901000  | 8.040394000  |
| 8  | -0.301568000 | 1.283951000  | 7.193385000  |
| 16 | -2.436428000 | 2.210764000  | 9.908130000  |
| 6  | -3.585938000 | 3.433659000  | 10.240529000 |
| 7  | -4.868762000 | 3.346587000  | 9.955611000  |
| 7  | -3.137636000 | 4.571701000  | 10.826865000 |
| 1  | -5.474258000 | 4.135629000  | 10.118788000 |
| 1  | -5.306779000 | 2.478103000  | 9.570407000  |
| 1  | -2.173317000 | 4.593900000  | 11.110414000 |
| 1  | -3.776499000 | 5.171863000  | 11.322751000 |
| 16 | -4.111149000 | 2.574847000  | 6.456524000  |
| 6  | -2.869491000 | 3.735028000  | 6.269327000  |
| 7  | -3.228778000 | 4.972279000  | 5.843138000  |
| 1  | -2.542453000 | 5.577075000  | 5.421388000  |
| 1  | -4.184321000 | 5.098921000  | 5.557508000  |
| 7  | -1.596572000 | 3.510469000  | 6.516321000  |
| 1  | -1.215890000 | 2.582681000  | 6.817189000  |
| 1  | -0.932056000 | 4.265355000  | 6.443760000  |

**d. Zn(BzO)<sub>2</sub>(pyNH<sub>2</sub>)<sub>2</sub>**

|   |               |              |              |
|---|---------------|--------------|--------------|
| 8 | -4.634485000  | -0.205016000 | 7.286244000  |
| 6 | -5.541515000  | 0.008825000  | 8.136391000  |
| 6 | -6.819117000  | -0.764049000 | 8.091543000  |
| 6 | -6.981767000  | -1.785948000 | 7.145064000  |
| 1 | -6.157682000  | -1.997941000 | 6.463473000  |
| 6 | -8.174292000  | -2.507108000 | 7.090226000  |
| 1 | -8.296151000  | -3.303368000 | 6.354053000  |
| 6 | -9.214516000  | -2.209651000 | 7.976991000  |
| 1 | -10.148626000 | -2.772033000 | 7.931076000  |
| 6 | -9.057332000  | -1.191046000 | 8.922102000  |
| 1 | -9.869123000  | -0.957079000 | 9.612979000  |
| 6 | -7.862986000  | -0.472325000 | 8.981049000  |
| 1 | -7.720304000  | 0.327127000  | 9.707950000  |
| 8 | -5.394401000  | 0.909777000  | 9.051788000  |
| 1 | -4.790360000  | 1.391930000  | 10.683184000 |
| 7 | -3.979402000  | 2.777697000  | 6.850496000  |
| 6 | -3.573046000  | 2.735608000  | 5.554596000  |
| 6 | -4.237113000  | 3.511488000  | 4.570320000  |
| 1 | -3.903478000  | 3.459541000  | 3.533390000  |
| 6 | -5.290123000  | 4.323225000  | 4.943356000  |
| 1 | -5.806328000  | 4.920846000  | 4.190633000  |
| 6 | -5.690857000  | 4.374981000  | 6.289323000  |

|    |              |              |              |
|----|--------------|--------------|--------------|
| 1  | -6.518179000 | 5.000702000  | 6.618613000  |
| 6  | -5.007250000 | 3.582825000  | 7.194346000  |
| 1  | -5.285111000 | 3.552281000  | 8.248904000  |
| 7  | -4.332947000 | 1.955617000  | 11.410482000 |
| 1  | -4.574775000 | 1.806975000  | 12.379873000 |
| 8  | -2.209825000 | -0.204999000 | 9.372111000  |
| 6  | -1.302798000 | 0.008846000  | 8.521964000  |
| 6  | -0.025191000 | -0.764020000 | 8.566815000  |
| 6  | 0.137462000  | -1.785917000 | 9.513296000  |
| 1  | -0.686624000 | -1.997912000 | 10.194885000 |
| 6  | 1.329990000  | -2.507072000 | 9.568137000  |
| 1  | 1.451851000  | -3.303330000 | 10.304312000 |
| 6  | 2.370214000  | -2.209612000 | 8.681375000  |
| 1  | 3.304327000  | -2.771989000 | 8.727293000  |
| 6  | 2.213029000  | -1.191008000 | 7.736262000  |
| 1  | 3.024819000  | -0.957039000 | 7.045387000  |
| 6  | 1.018679000  | -0.472292000 | 7.677311000  |
| 1  | 0.875995000  | 0.327158000  | 6.950409000  |
| 30 | -3.422165000 | 1.372909000  | 8.329175000  |
| 7  | -2.864921000 | 2.777690000  | 9.807861000  |
| 6  | -3.271328000 | 2.735639000  | 11.103744000 |
| 6  | -1.153404000 | 4.374889000  | 10.369074000 |
| 1  | -0.326037000 | 5.000563000  | 10.039809000 |
| 6  | -1.837020000 | 3.582759000  | 9.464035000  |
| 1  | -1.559125000 | 3.552190000  | 8.409486000  |
| 8  | -1.449920000 | 0.909791000  | 7.606560000  |
| 7  | -2.511480000 | 1.955528000  | 5.247827000  |
| 1  | -2.054044000 | 1.391851000  | 5.975120000  |
| 1  | -2.269693000 | 1.806869000  | 4.278429000  |
| 6  | -2.607260000 | 3.511498000  | 12.088035000 |
| 1  | -2.940937000 | 3.459585000  | 13.124954000 |
| 6  | -1.554193000 | 4.323174000  | 11.715026000 |
| 1  | -1.037984000 | 4.920779000  | 12.467759000 |

e.  $\text{Zn(SPh)}_4$

|    |              |              |              |
|----|--------------|--------------|--------------|
| 30 | -0.929808000 | 0.789444000  | -0.669967000 |
| 16 | -0.623285000 | 1.795111000  | 1.490317000  |
| 16 | -0.097782000 | -1.397379000 | -0.120825000 |
| 16 | -3.133011000 | 0.378770000  | -1.488607000 |
| 16 | 0.108001000  | 1.991089000  | -2.450389000 |
| 6  | 1.712729000  | 2.423517000  | -1.880778000 |
| 6  | 2.408188000  | 3.477003000  | -2.502377000 |
| 6  | 2.350678000  | 1.770859000  | -0.811510000 |
| 6  | 3.669799000  | 3.864187000  | -2.073797000 |
| 1  | 1.926463000  | 4.001316000  | -3.318859000 |

|   |              |              |              |
|---|--------------|--------------|--------------|
| 6 | 3.608498000  | 2.168034000  | -0.382287000 |
| 1 | 1.843674000  | 0.958094000  | -0.311011000 |
| 6 | 4.284961000  | 3.214232000  | -1.006251000 |
| 1 | 4.173775000  | 4.686671000  | -2.572265000 |
| 1 | 4.062765000  | 1.651461000  | 0.456471000  |
| 1 | 5.258366000  | 3.533776000  | -0.651213000 |
| 6 | -3.771317000 | 1.941052000  | -1.969570000 |
| 6 | -4.785294000 | 2.019537000  | -2.943277000 |
| 6 | -3.324735000 | 3.153568000  | -1.414787000 |
| 6 | -5.307686000 | 3.239565000  | -3.350903000 |
| 1 | -5.144066000 | 1.099518000  | -3.389362000 |
| 6 | -3.842479000 | 4.370215000  | -1.828532000 |
| 1 | -2.558466000 | 3.133649000  | -0.654074000 |
| 6 | -4.838769000 | 4.430942000  | -2.802020000 |
| 1 | -6.081800000 | 3.261355000  | -4.112607000 |
| 1 | -3.453325000 | 5.278678000  | -1.381308000 |
| 1 | -5.236701000 | 5.384128000  | -3.133165000 |
| 6 | -0.097583000 | -2.330393000 | -1.607834000 |
| 6 | -0.040195000 | -1.742694000 | -2.883593000 |
| 6 | -0.133012000 | -3.736826000 | -1.549614000 |
| 6 | -0.030219000 | -2.521920000 | -4.030249000 |
| 1 | -0.000866000 | -0.664171000 | -2.965670000 |
| 6 | -0.117596000 | -4.511874000 | -2.702066000 |
| 1 | -0.187368000 | -4.210155000 | -0.575860000 |
| 6 | -0.067400000 | -3.913746000 | -3.958779000 |
| 1 | 0.005455000  | -2.028139000 | -4.995964000 |
| 1 | -0.154242000 | -5.594424000 | -2.616160000 |
| 1 | -0.064557000 | -4.516512000 | -4.859998000 |
| 6 | -0.548416000 | 3.548884000  | 1.473878000  |
| 6 | -0.644701000 | 4.242880000  | 2.697817000  |
| 6 | -0.386033000 | 4.327567000  | 0.313966000  |
| 6 | -0.597507000 | 5.628329000  | 2.755280000  |
| 1 | -0.767796000 | 3.665965000  | 3.606944000  |
| 6 | -0.345396000 | 5.713677000  | 0.377760000  |
| 1 | -0.292430000 | 3.834523000  | -0.642922000 |
| 6 | -0.452792000 | 6.385157000  | 1.593568000  |
| 1 | -0.678744000 | 6.124925000  | 3.718051000  |
| 1 | -0.219850000 | 6.274377000  | -0.542498000 |
| 1 | -0.419629000 | 7.468579000  | 1.636898000  |

**f.  $\text{Zn}^{\text{(MeIm)}}_2(\text{SPh})_2$**

|    |              |             |             |
|----|--------------|-------------|-------------|
| 30 | -0.428805000 | 3.632691000 | 2.293323000 |
| 16 | -1.475704000 | 2.605861000 | 0.507416000 |
| 7  | -1.872363000 | 4.838838000 | 3.181948000 |
| 7  | -3.947208000 | 5.387754000 | 3.635480000 |

|    |              |             |              |
|----|--------------|-------------|--------------|
| 6  | -3.019159000 | 2.201394000 | 1.279384000  |
| 6  | -4.214078000 | 2.350713000 | 0.562919000  |
| 6  | -5.445397000 | 2.135214000 | 1.170489000  |
| 6  | -5.516814000 | 1.765756000 | 2.509990000  |
| 6  | -4.335256000 | 1.587933000 | 3.223427000  |
| 6  | -3.103028000 | 1.784933000 | 2.615609000  |
| 6  | -1.958177000 | 5.131240000 | 4.524624000  |
| 6  | -3.244815000 | 5.470649000 | 4.821876000  |
| 6  | -3.081909000 | 5.003467000 | 2.677812000  |
| 6  | -5.382101000 | 5.533510000 | 3.476071000  |
| 1  | -4.166385000 | 2.664186000 | -0.472214000 |
| 1  | -6.354098000 | 2.262588000 | 0.593854000  |
| 1  | -6.475451000 | 1.600833000 | 2.985537000  |
| 1  | -4.369323000 | 1.281748000 | 4.261996000  |
| 1  | -2.193334000 | 1.632570000 | 3.181962000  |
| 1  | -1.099505000 | 5.055771000 | 5.168631000  |
| 1  | -3.718213000 | 5.759513000 | 5.743254000  |
| 1  | -3.365752000 | 4.809570000 | 1.658491000  |
| 1  | -5.618608000 | 5.557086000 | 2.415336000  |
| 1  | -5.717784000 | 6.459223000 | 3.942429000  |
| 1  | -5.896856000 | 4.686035000 | 3.927552000  |
| 16 | 0.618374000  | 2.602254000 | 4.077099000  |
| 7  | 1.017113000  | 4.838193000 | 1.407554000  |
| 6  | 2.159007000  | 2.194814000 | 3.300877000  |
| 6  | 1.105041000  | 5.132825000 | 0.065526000  |
| 6  | 2.226097000  | 5.000802000 | 1.913653000  |
| 6  | 3.356040000  | 2.340542000 | 4.014548000  |
| 6  | 2.238595000  | 1.780037000 | 1.963856000  |
| 6  | 2.392431000  | 5.471468000 | -0.229381000 |
| 1  | 0.247159000  | 5.059358000 | -0.579773000 |
| 7  | 3.093125000  | 5.385783000 | 0.957823000  |
| 1  | 2.508233000  | 4.804776000 | 2.933034000  |
| 6  | 4.585380000  | 2.123761000 | 3.403428000  |
| 1  | 3.311583000  | 2.652347000 | 5.050330000  |
| 6  | 3.468877000  | 1.581826000 | 1.352493000  |
| 1  | 1.327218000  | 1.630137000 | 1.399546000  |
| 1  | 2.867386000  | 5.761445000 | -1.149605000 |
| 6  | 4.527954000  | 5.529630000 | 1.119537000  |
| 6  | 4.652618000  | 1.756560000 | 2.063074000  |
| 1  | 5.495802000  | 2.248371000 | 3.977956000  |
| 1  | 3.499688000  | 1.277237000 | 0.313353000  |
| 1  | 4.763023000  | 5.550404000 | 2.180653000  |
| 1  | 4.865263000  | 6.456102000 | 0.655849000  |
| 1  | 5.042391000  | 4.682670000 | 0.666745000  |
| 1  | 5.609718000  | 1.590823000 | 1.584730000  |

g.  $\text{Zn}(\text{MeIm})_4$

|    |              |              |              |
|----|--------------|--------------|--------------|
| 30 | 18.615736000 | 0.000019000  | -3.723859000 |
| 7  | 17.288612000 | -1.069184000 | -2.657174000 |
| 7  | 16.095597000 | -2.800368000 | -2.027176000 |
| 6  | 16.289721000 | -0.626645000 | -1.809895000 |
| 1  | 16.187011000 | 0.407893000  | -1.531737000 |
| 6  | 17.138148000 | -2.384863000 | -2.759487000 |
| 1  | 17.756998000 | -3.046356000 | -3.340945000 |
| 6  | 15.544604000 | -1.696603000 | -1.412975000 |
| 1  | 14.693806000 | -1.767627000 | -0.758227000 |
| 6  | 15.653914000 | -4.186829000 | -1.895083000 |
| 1  | 16.246351000 | -4.807272000 | -2.561632000 |
| 1  | 14.604149000 | -4.267246000 | -2.172756000 |
| 1  | 15.796282000 | -4.524377000 | -0.869746000 |
| 7  | 19.943525000 | 1.069019000  | -2.657759000 |
| 7  | 21.137531000 | 2.799896000  | -2.028781000 |
| 6  | 20.943171000 | 0.626203000  | -1.811515000 |
| 1  | 21.045946000 | -0.408381000 | -1.533553000 |
| 6  | 20.094167000 | 2.384674000  | -2.760095000 |
| 1  | 19.474875000 | 3.046360000  | -3.340857000 |
| 6  | 21.688903000 | 1.695965000  | -1.415221000 |
| 1  | 22.540349000 | 1.766761000  | -0.761293000 |
| 6  | 21.579471000 | 4.186288000  | -1.896839000 |
| 1  | 20.986981000 | 4.806810000  | -2.563268000 |
| 1  | 22.629179000 | 4.266519000  | -2.174779000 |
| 1  | 21.437419000 | 4.523893000  | -0.871476000 |
| 7  | 17.546415000 | 1.327533000  | -4.789991000 |
| 7  | 15.815119000 | 2.520723000  | -5.419349000 |
| 6  | 17.988837000 | 2.326842000  | -5.636834000 |
| 1  | 19.023351000 | 2.429751000  | -5.915007000 |
| 6  | 16.230730000 | 1.477842000  | -4.687563000 |
| 1  | 15.569303000 | 0.858677000  | -4.106369000 |
| 6  | 16.918818000 | 3.072102000  | -6.033318000 |
| 1  | 16.847706000 | 3.923221000  | -6.687638000 |
| 6  | 14.428615000 | 2.962330000  | -5.551213000 |
| 1  | 13.808267000 | 2.369654000  | -4.884786000 |
| 1  | 14.348134000 | 4.012009000  | -5.273232000 |
| 1  | 14.091003000 | 2.820230000  | -6.576565000 |
| 7  | 19.684685000 | -1.327260000 | -4.790694000 |
| 7  | 21.415861000 | -2.520240000 | -5.420807000 |
| 6  | 19.242079000 | -2.326370000 | -5.637678000 |
| 1  | 18.207493000 | -2.429248000 | -5.915597000 |
| 6  | 21.000403000 | -1.477583000 | -4.688619000 |
| 1  | 21.661965000 | -0.858574000 | -4.107415000 |
| 6  | 20.312026000 | -3.071469000 | -6.034664000 |

|   |              |              |              |
|---|--------------|--------------|--------------|
| 1 | 20.382993000 | -3.922407000 | -6.689237000 |
| 6 | 22.802332000 | -2.961850000 | -5.553024000 |
| 1 | 23.422829000 | -2.369259000 | -4.886662000 |
| 1 | 22.882858000 | -4.011562000 | -5.275178000 |
| 1 | 23.139734000 | -2.819641000 | -6.578431000 |

**h. Zn(<sup>Me</sup>Im)<sub>6</sub>**

|    |              |              |              |
|----|--------------|--------------|--------------|
| 30 | 15.526614000 | 0.646268000  | -3.079572000 |
| 7  | 15.397531000 | -0.523604000 | -1.213433000 |
| 7  | 16.137095000 | -1.875288000 | 0.361300000  |
| 6  | 14.953519000 | -0.064381000 | 0.006821000  |
| 1  | 14.366748000 | 0.830977000  | 0.098756000  |
| 6  | 16.103682000 | -1.613788000 | -0.962963000 |
| 1  | 16.606058000 | -2.218706000 | -1.697301000 |
| 6  | 15.406247000 | -0.893496000 | 0.993315000  |
| 1  | 15.278565000 | -0.873646000 | 2.061809000  |
| 6  | 16.860509000 | -2.961827000 | 1.010685000  |
| 1  | 17.337108000 | -3.574110000 | 0.248242000  |
| 1  | 16.174603000 | -3.579884000 | 1.588328000  |
| 1  | 17.625382000 | -2.555814000 | 1.671676000  |
| 7  | 17.396419000 | 1.529720000  | -2.324015000 |
| 7  | 19.345765000 | 2.555936000  | -2.309954000 |
| 6  | 18.015869000 | 1.284212000  | -1.117812000 |
| 1  | 17.552098000 | 0.693045000  | -0.350067000 |
| 6  | 18.220582000 | 2.301665000  | -3.014120000 |
| 1  | 18.041816000 | 2.678848000  | -4.006181000 |
| 6  | 19.226433000 | 1.914230000  | -1.097689000 |
| 1  | 19.997422000 | 1.967806000  | -0.348705000 |
| 6  | 20.493652000 | 3.343988000  | -2.742395000 |
| 1  | 20.306160000 | 3.725958000  | -3.743094000 |
| 1  | 21.387047000 | 2.720767000  | -2.755761000 |
| 1  | 20.648978000 | 4.182151000  | -2.065713000 |
| 7  | 13.656724000 | -0.236849000 | -3.837047000 |
| 7  | 11.708394000 | -1.265037000 | -3.852877000 |
| 6  | 13.036824000 | 0.010419000  | -5.042671000 |
| 1  | 13.499893000 | 0.603454000  | -5.809391000 |
| 6  | 12.833437000 | -1.011006000 | -3.148373000 |
| 1  | 13.012746000 | -1.390220000 | -2.157184000 |
| 6  | 11.826838000 | -0.620674000 | -5.063810000 |
| 1  | 11.055796000 | -0.673567000 | -5.812795000 |
| 6  | 10.561351000 | -2.055112000 | -3.421922000 |
| 1  | 10.749347000 | -2.439018000 | -2.422062000 |
| 1  | 9.667359000  | -1.432782000 | -3.407104000 |
| 1  | 10.406762000 | -2.891995000 | -4.100359000 |
| 7  | 16.666564000 | -0.959219000 | -4.031694000 |



|   |              |              |              |
|---|--------------|--------------|--------------|
| 7 | 18.390384000 | -2.084475000 | -4.813287000 |
| 6 | 16.198668000 | -1.992052000 | -4.814660000 |
| 1 | 15.147399000 | -2.151312000 | -4.976168000 |
| 6 | 17.985879000 | -1.045980000 | -4.053689000 |
| 1 | 18.668110000 | -0.392139000 | -3.540016000 |
| 6 | 17.259930000 | -2.696903000 | -5.309307000 |
| 1 | 17.309821000 | -3.558315000 | -5.952151000 |
| 6 | 19.774471000 | -2.450834000 | -5.087301000 |
| 1 | 20.426368000 | -1.839006000 | -4.469168000 |
| 1 | 19.938937000 | -3.499510000 | -4.844906000 |
| 1 | 20.010992000 | -2.274443000 | -6.136334000 |
| 1 | 15.907718000 | 3.454472000  | -1.200757000 |
| 6 | 14.856164000 | 3.293717000  | -1.358869000 |
| 6 | 13.795789000 | 4.004057000  | -0.870218000 |
| 1 | 13.746975000 | 4.872182000  | -0.236427000 |
| 1 | 11.118375000 | 4.804181000  | -1.326026000 |
| 7 | 14.386822000 | 2.252685000  | -2.130046000 |
| 7 | 12.664495000 | 3.386840000  | -1.358106000 |
| 6 | 13.067591000 | 2.339960000  | -2.106971000 |
| 6 | 11.280818000 | 3.755048000  | -1.084391000 |
| 1 | 12.384286000 | 1.680734000  | -2.612160000 |
| 1 | 10.628201000 | 3.144998000  | -1.703522000 |
| 1 | 11.043329000 | 3.578246000  | -0.035618000 |
| 1 | 13.421573000 | 3.843462000  | -7.832840000 |
| 1 | 14.442236000 | 3.510429000  | -4.463992000 |
| 1 | 13.707080000 | 4.862828000  | -6.409602000 |
| 6 | 14.946092000 | 2.906384000  | -5.198032000 |
| 6 | 14.185346000 | 4.251714000  | -7.171945000 |
| 7 | 14.911743000 | 3.167318000  | -6.522399000 |
| 7 | 15.655328000 | 1.818308000  | -4.947166000 |
| 6 | 15.645293000 | 2.187364000  | -7.154150000 |
| 6 | 16.100447000 | 1.359931000  | -6.167347000 |
| 1 | 15.772905000 | 2.167468000  | -8.222654000 |
| 1 | 14.869525000 | 4.871606000  | -7.749677000 |
| 1 | 16.689911000 | 0.466345000  | -6.259244000 |

**a.**  $\text{Zn}(\text{BzO})_2(\text{SC}(\text{NH}_2)_2)_2$

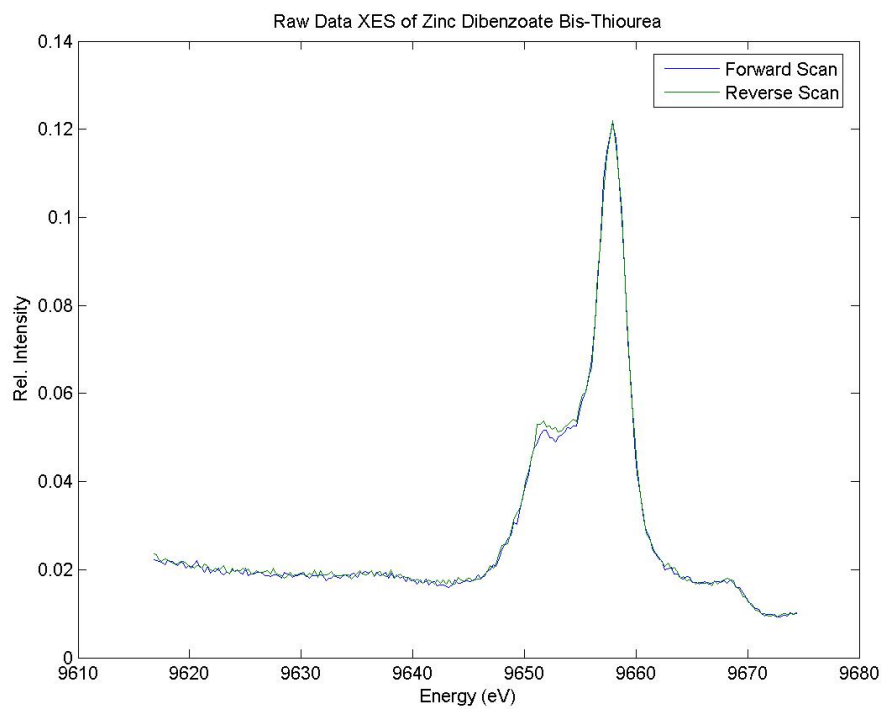

**b.**  $\text{Zn}(\text{BzO})_2(\text{pyNH}_2)_2$

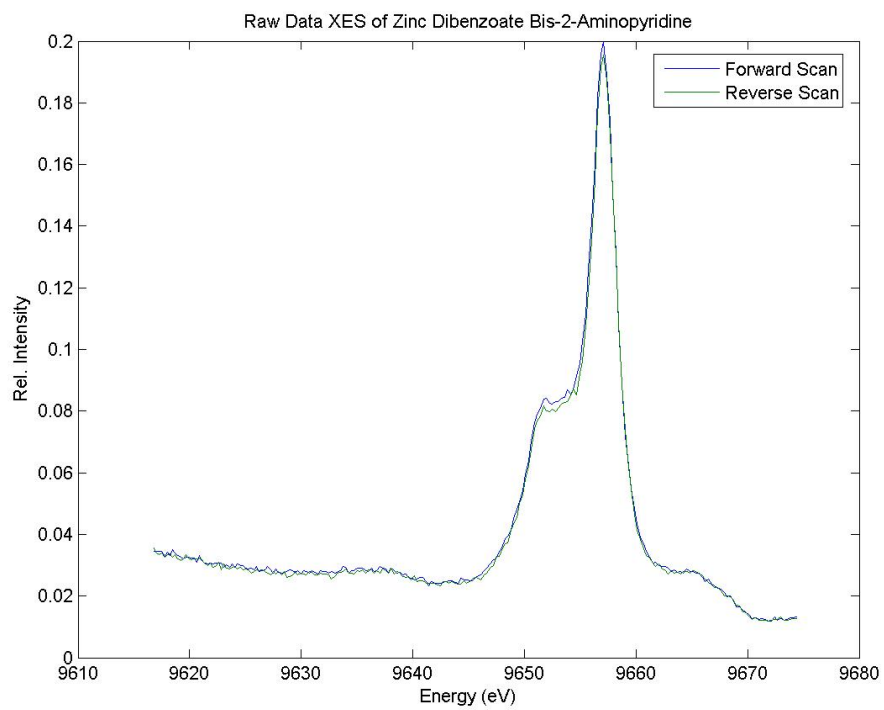

c.  $\text{Zn}(\text{SPh})_4$

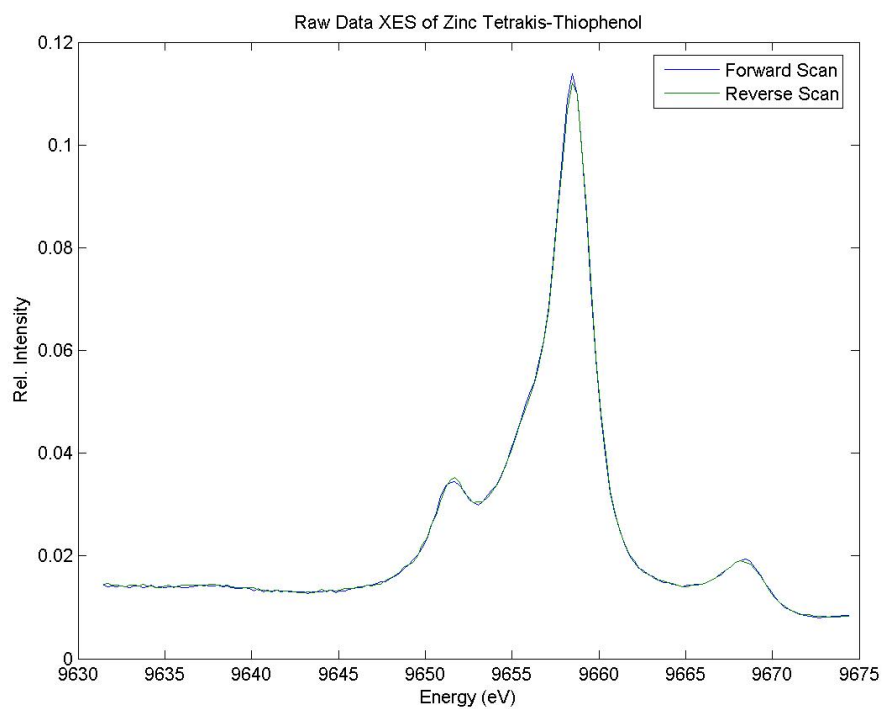

d.  $\text{Zn}(\text{MeIm})_2(\text{SPh})_2$

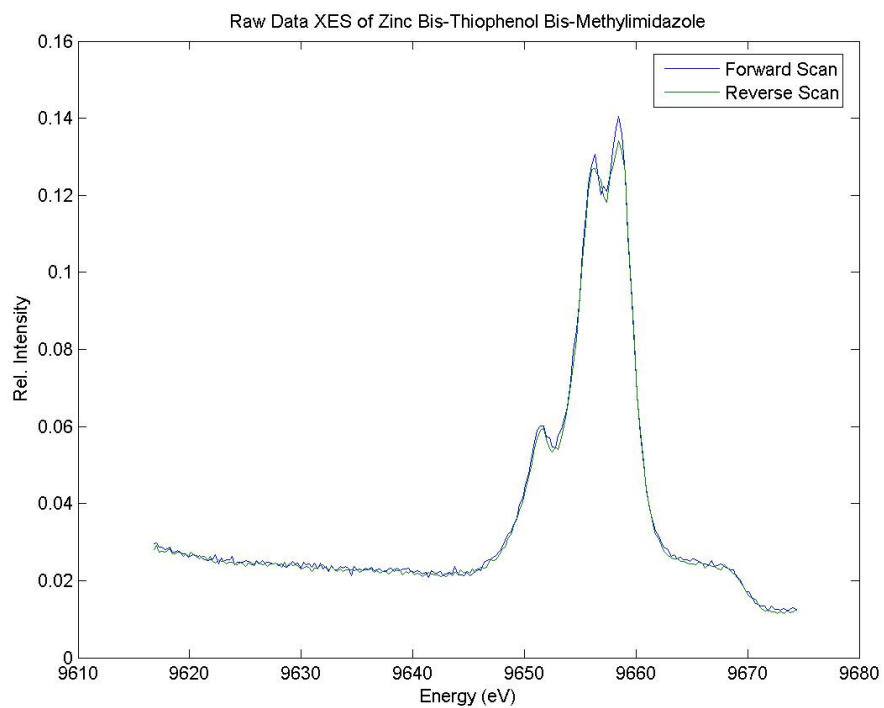

e.  $\text{Zn}(\text{MeIm})_4$

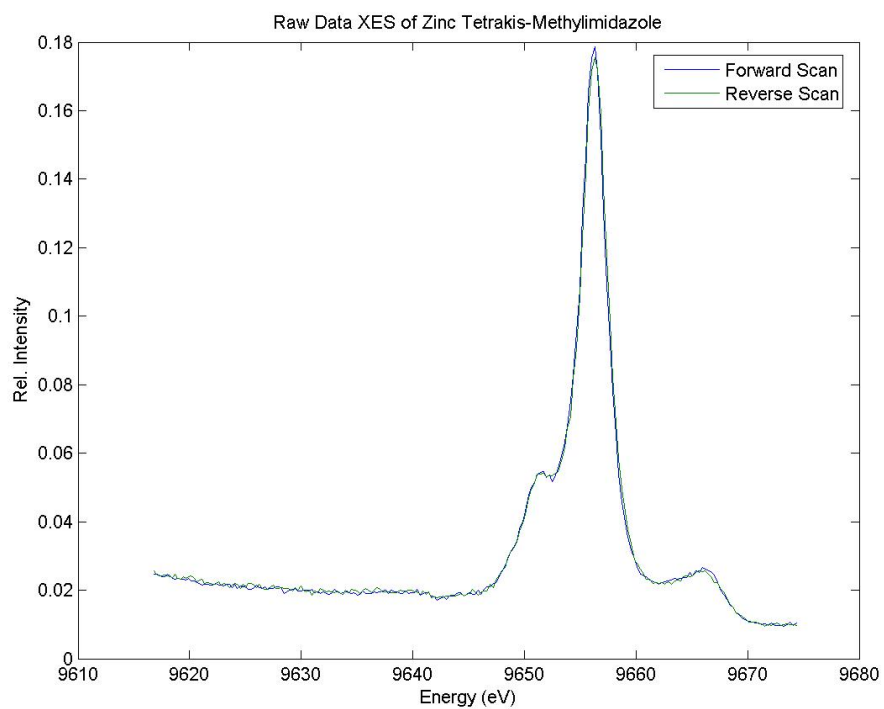

f.  $\text{Zn}(\text{MeIm})_6$

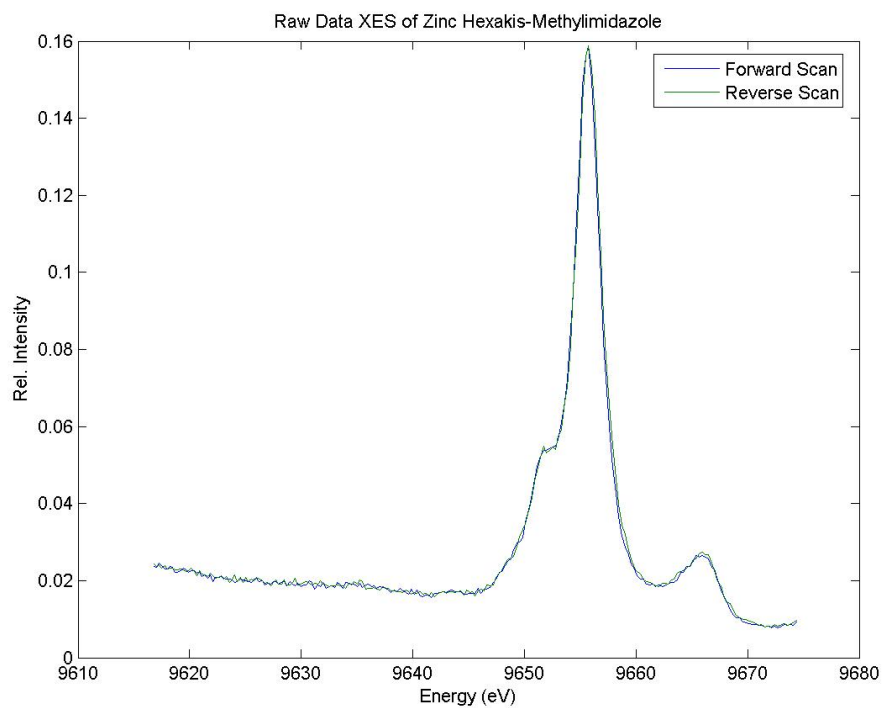

**Figure S1.** Zn VtC XES cans were collected from both lowest to highest energy and highest to lowest energy. The forward and reverse scans are shown for each complex.

**a.**  $\text{Zn}(\text{BzO})_2(\text{SC}(\text{NH}_2)_2)_2$

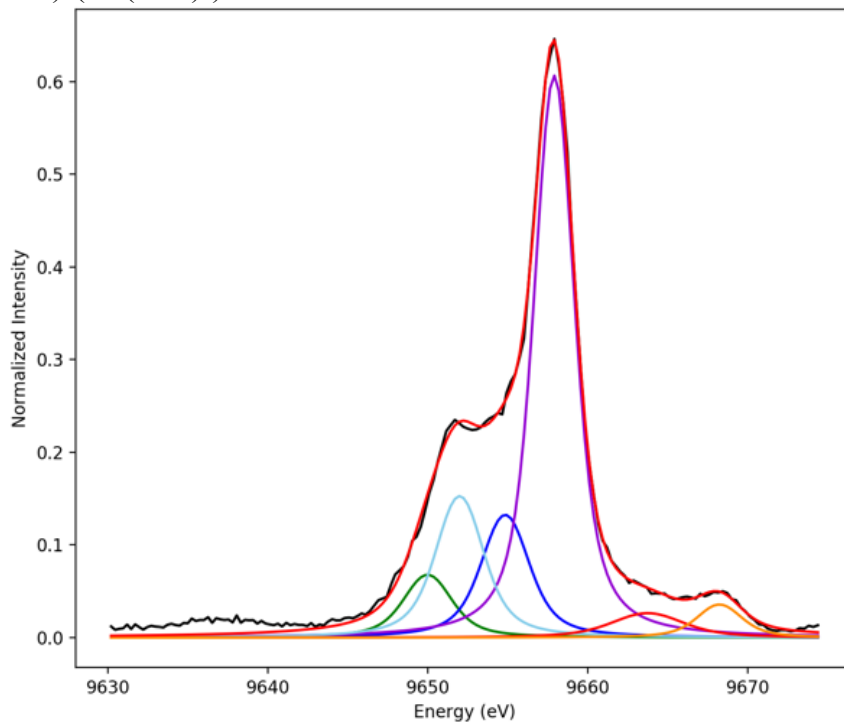

**b.**  $\text{Zn}(\text{BzO})_2(\text{pyNH}_2)_2$

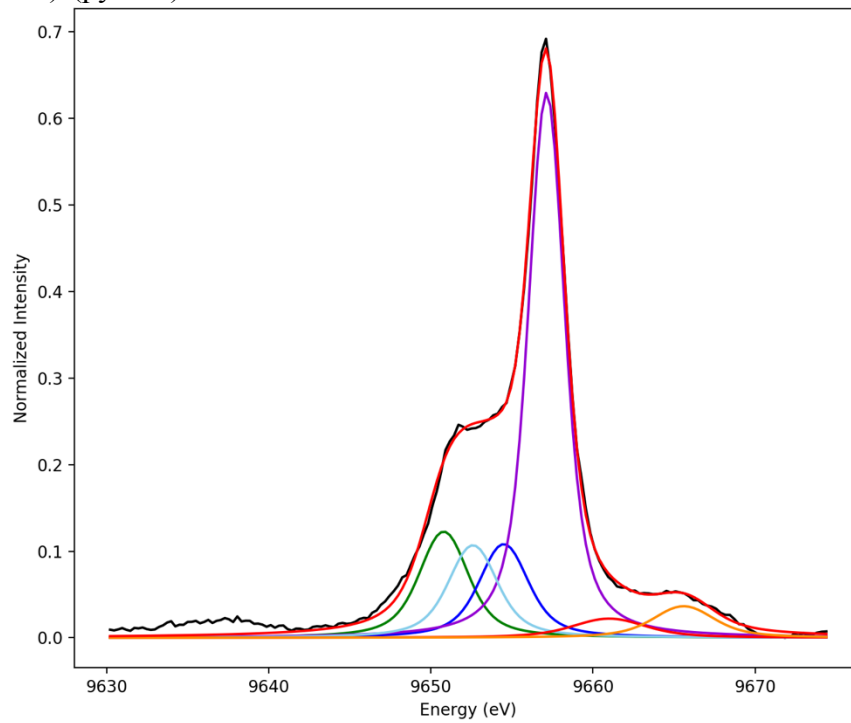

c.  $\text{Zn}(\text{SPh})_4$

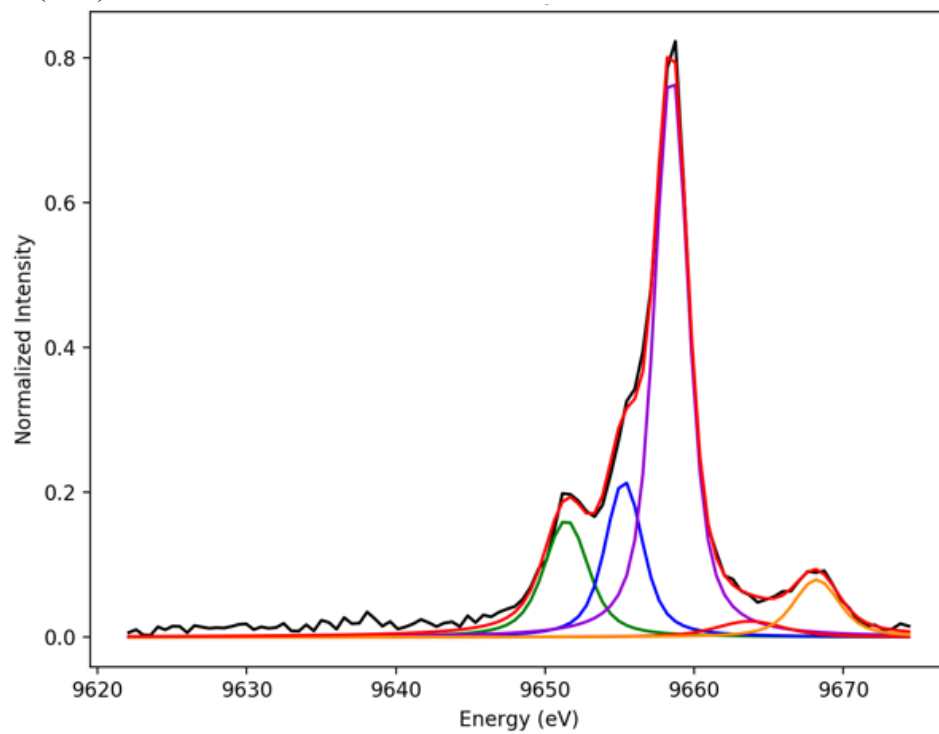

d.  $\text{Zn}(\text{MeIm})_2(\text{SPh})_2$

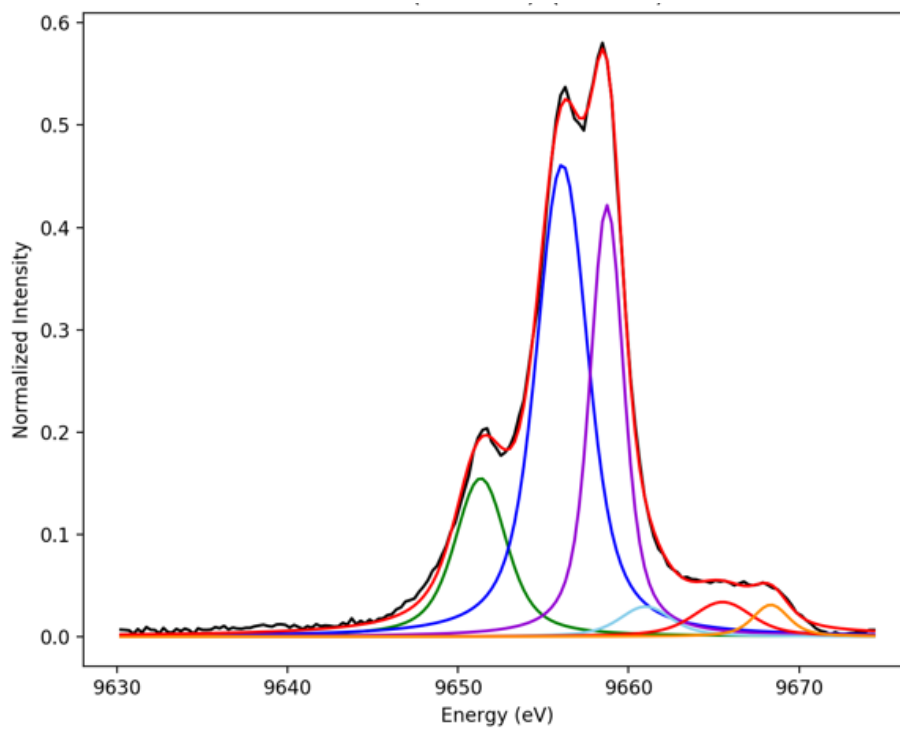

e.  $\text{Zn}(\text{MeIm})_4$

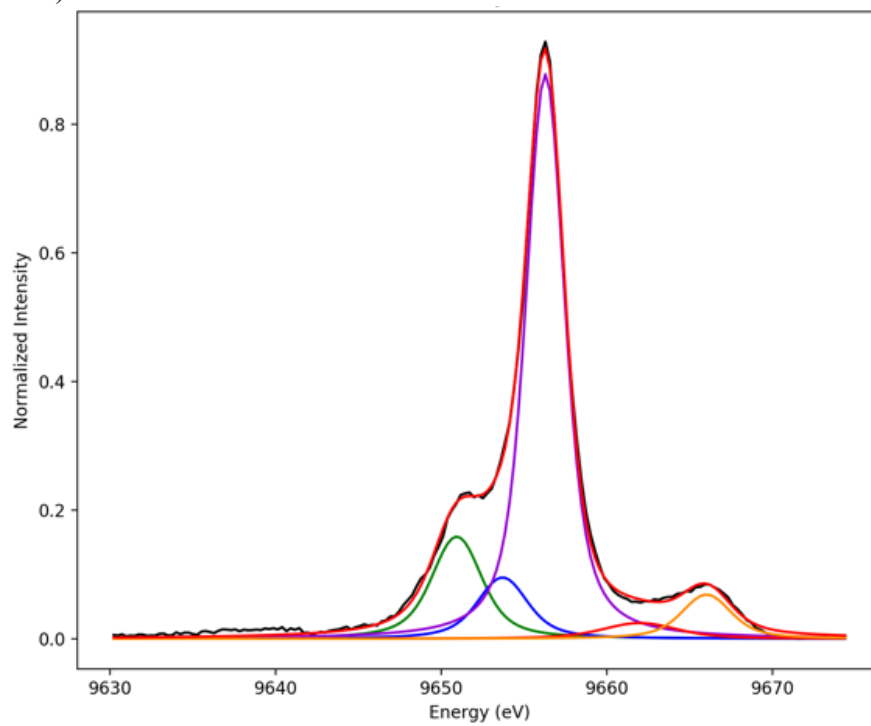

f.  $\text{Zn}(\text{MeIm})_6$

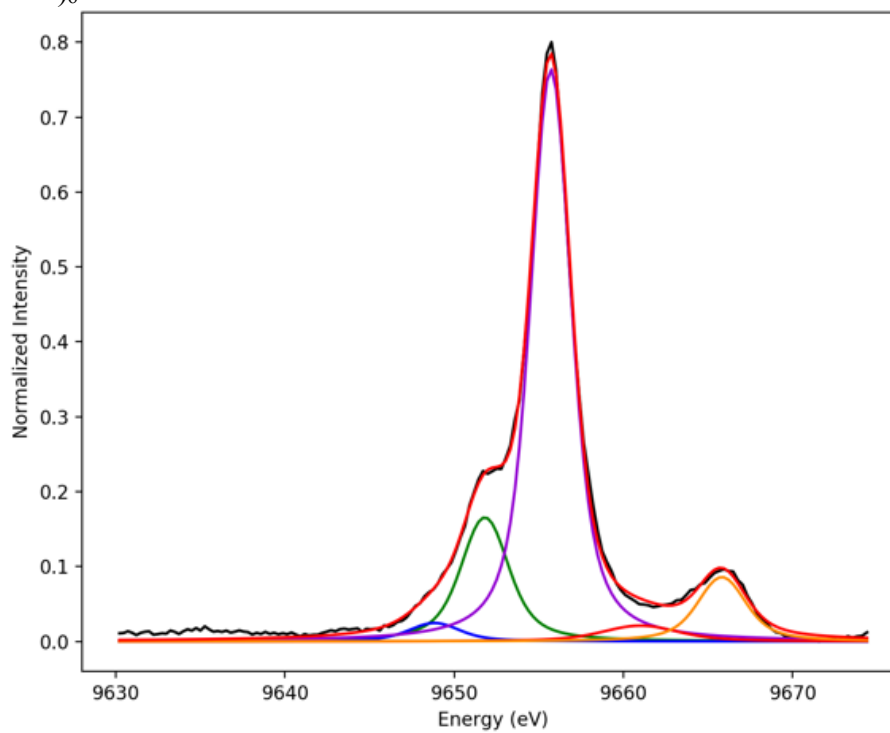

**Figure S2.** Fits to experimental VtC XES data

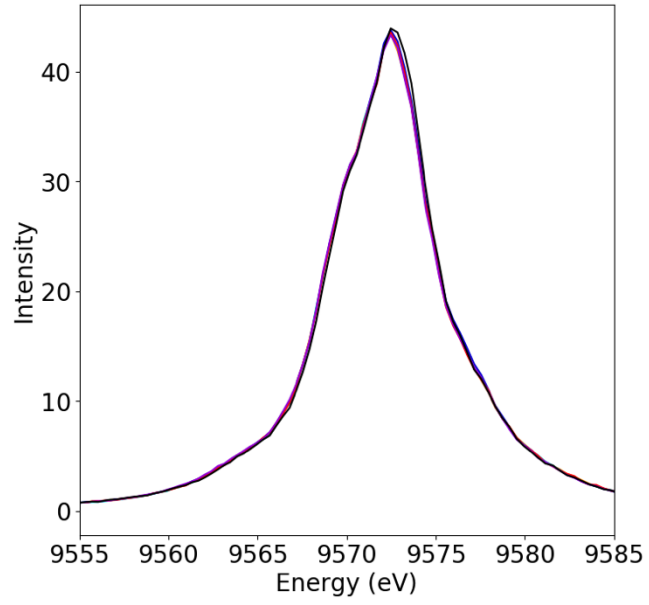

**Figure S3.** Overlay of K $\beta$  mainline region for all measured samples.



- a. Molecular model of geometry optimized  $\text{Zn}(\text{MeIm})_2(\text{SPh})_2$  with the angle of interest displayed

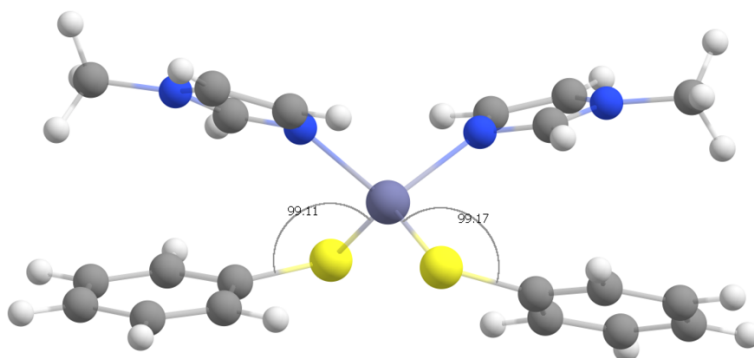

- b. The effect of modulating the displayed angle on the VtC spectra, with the spectra of geometry optimized  $\text{Zn}(\text{MeIm})_2(\text{SPh})_2$  and the average of the geometry optimized  $\text{Zn}(\text{MeIm})_4$  and  $\text{Zn}(\text{SPh})_4$  for reference.

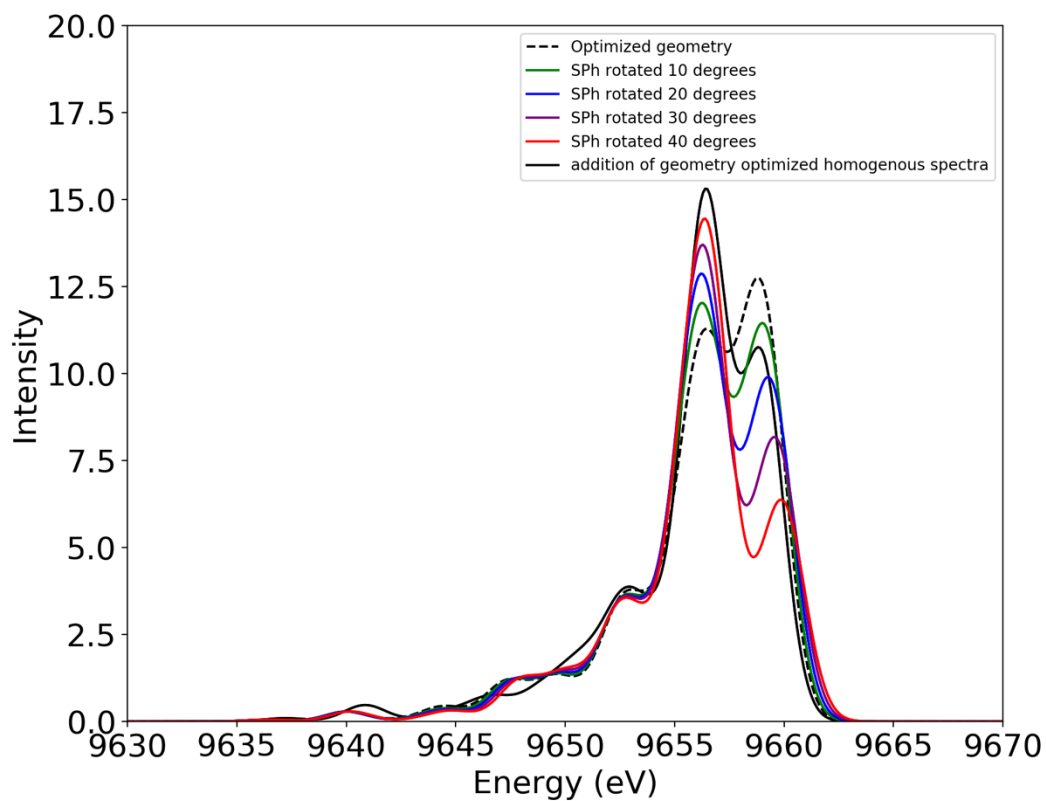

**Figure S4.**  $\text{Zn}(\text{MeIm})_2(\text{SPh})_2$  Ligand-Ligand Interaction Calculations
